# Supplementary material for: Bendamustine is a safe and effective lymphodepletion agent for axicabtagene ciloleucel in patients with refractory or relapsed large B-cell lymphoma
Source: PubMed Central journal article supplement — J Immunother Cancer. 2024 Jul 1;12(7):e008975. doi: 10.1136/jitc-2024-008975 (PMC11218002; doi:10.1136/jitc-2024-008975), 2024-07-01
Supplement: jitc-2024-008975supp001.pdf [file jitc-2024-008975supp001.pdf]

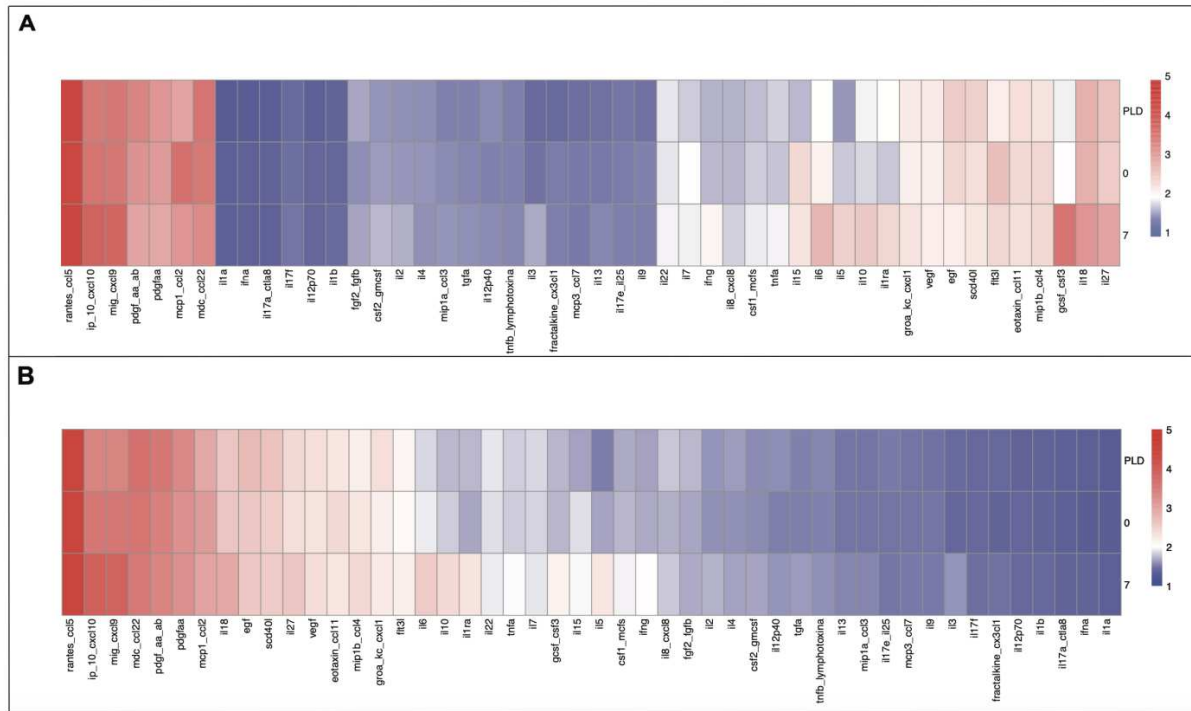

**Supplement Figure 1:** A. Heat maps of 48 cytokines levels measured on pre-lymphodepletion (PLD), Day 0, Day 7 in Fludarabine and Cytosin (FC) cohort. B. Heat maps of 48 cytokines measured on PLD, Day 0, Day 7 in bendamustine cohort.

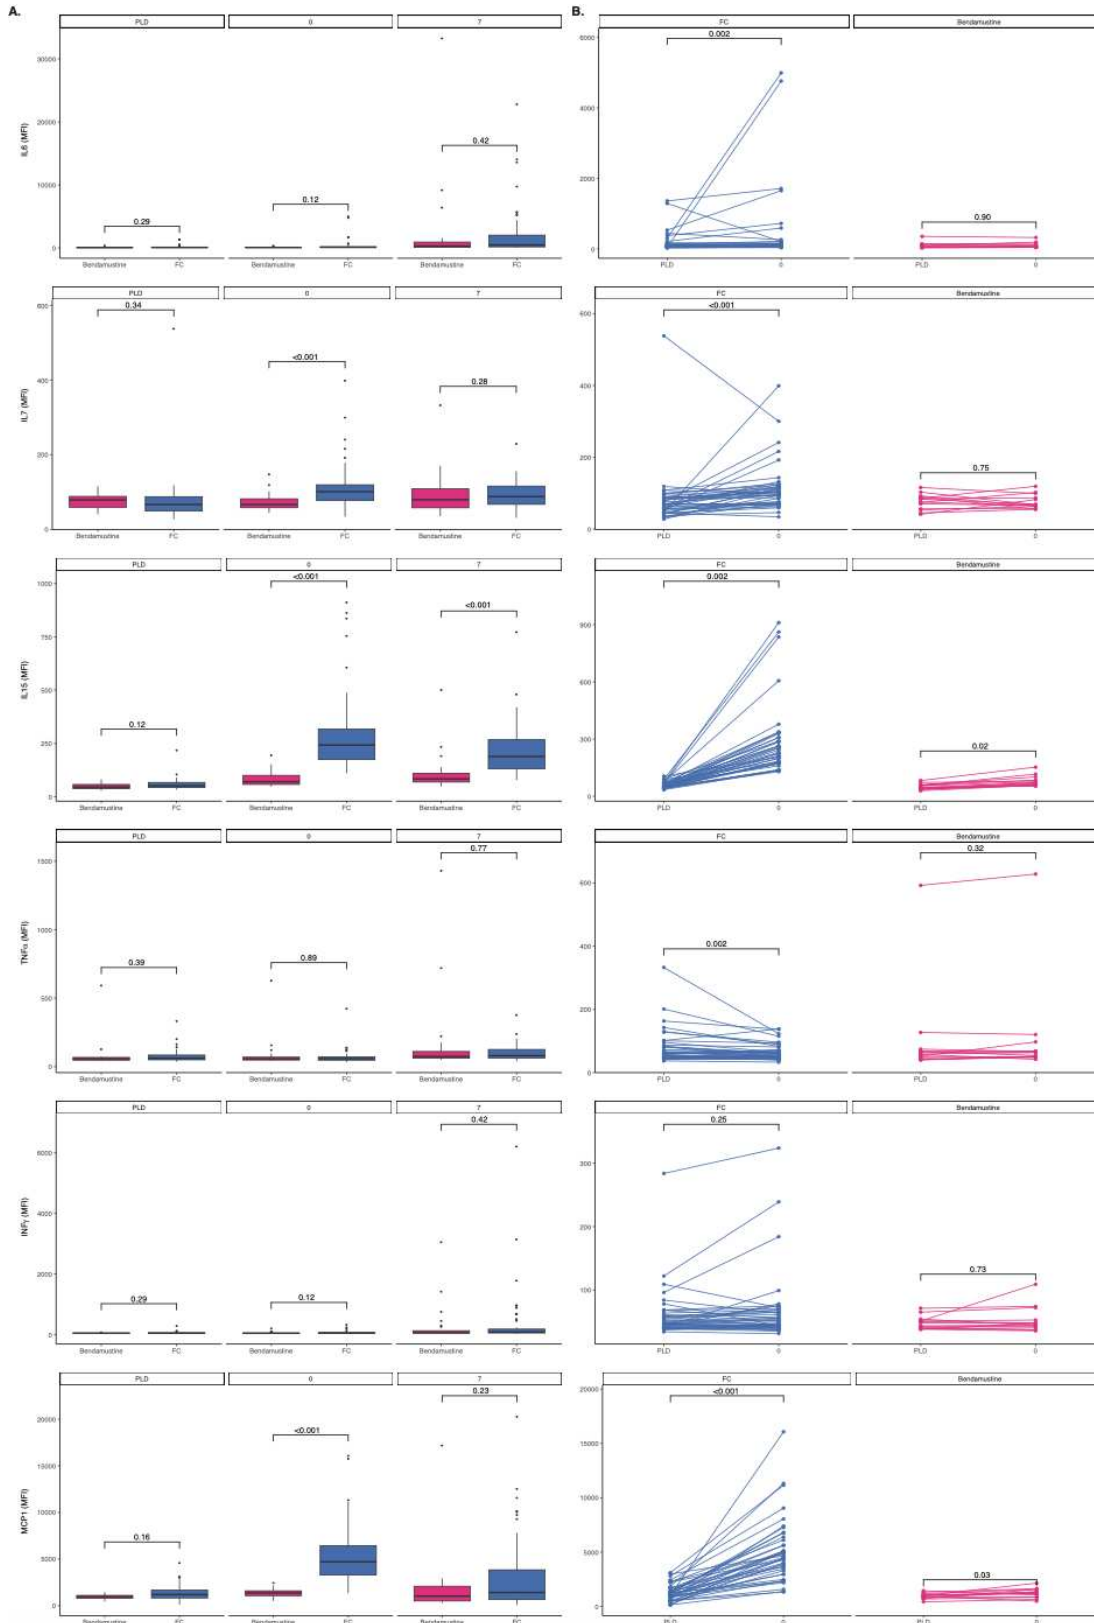

**Supplemental Figure 2:** Peak Mean fluorescence Intensity (MFI) (A) were compared using the unpaired Mann-Whitney U test (FC: n = 56, bendamustine: n = 26)

A. Vertical panel showing cytokine levels of IL 6, IL 7, IL15, tumor necrosis factor alpha (TNFa), Interferon gamma (IFNg), and Monocyte Chemoattractant Protein-1 (MCP1) at pre lymphodepletion, Day 0 and Day 7 comparing FC (blue) and bendamustine group (pink).

B. Vertical panel showing Raw MFIs of IL 6, IL 7, IL15, tumor necrosis factor alpha (TNFa), Interferon gamma (IFNg), and Monocyte Chemoattractant Protein-1 (MCP1) at pre-lymphodepletion (PLD) and D0 were compared with the unpaired Mann-Whitney U test (FC (blue): n = 41, bendamustine (pink): n = 14). In panel B, only patients who had both a PLD and D0 sample were included. Lines connect cytokine levels for individual patients.

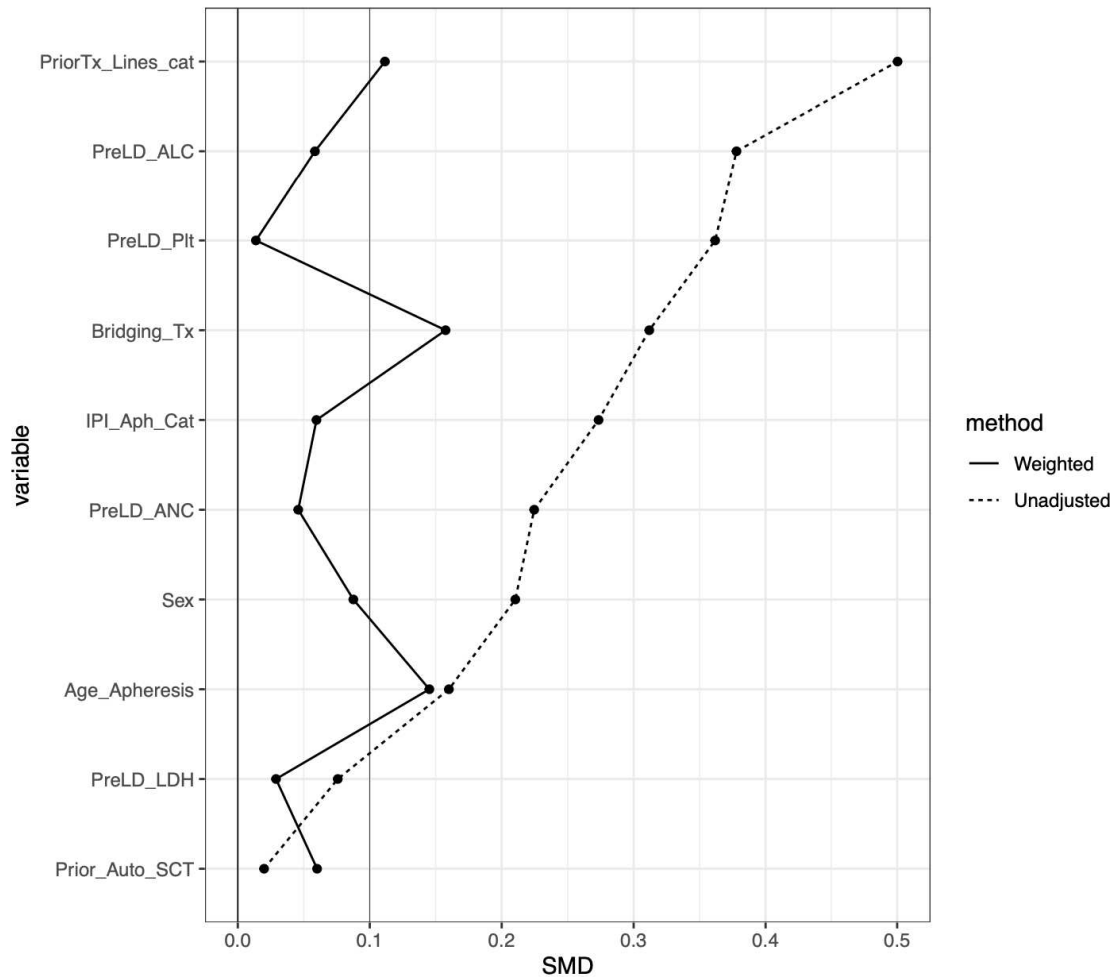

**Supplementary Figure 3:** Covariate balance as measured by standardized mean difference (SMD) before and after application of inverse probability of treatment weights (IPTW) to the study sample. Smaller SMD values, especially  $< 0.1$ , indicate a balance in the covariate between treatment groups.
