# Supplementary material for: Bendamustine is a safe and effective lymphodepletion agent for axicabtagene ciloleucel in patients with refractory or relapsed large B-cell lymphoma
Source: PubMed Central journal article supplement — J Immunother Cancer. 2024 Jul 1;12(7):e008975. doi: 10.1136/jitc-2024-008975 (PMC11218002; doi:10.1136/jitc-2024-008975), 2024-07-01

# Bendamustine is a Safe and Effective Lymphodepletion Agent for Axicabtagene Ciloleucel in Patients with Refractory or Relapsed Large B-Cell Lymphoma

**Summary** *Bendamustine* is a **safe and effective** alternative lymphodepletion conditioning for axi-cel with **comparable outcomes, lower early hematological toxicity, favorable immune reconstitution,** and **comparable expansion kinetics** as compared to fludarabine in combination with cyclophosphamide (FC) in patients receiving axicabtagene ciloleucel therapy for relapsed/refractory LBCLs.

**Study Design** Retrospective, single center from Stanford University  Inverse probability of treatment weights applied  Patients with relapsed or refractory DLBCL treated with axi-cel  CD4 and CD8 CAR-T cells measured @ 7, 14, 21, 28 days following infusion

**Population**  **84** patients FC (n=57) Bendamustine (n=27) IPTW variables

|                    |                |                            |
|--------------------|----------------|----------------------------|
| Age at Transfusion | Sex            | Bridging therapy before LD |
| IPI at apheresis   | Prior Auto SCT | ALC at Leukapheresis       |
| Pre-LD ALC         | Pre-LD ANC     | Pre-LD Platelets           |
| Pre-LD LDH         |                |                            |

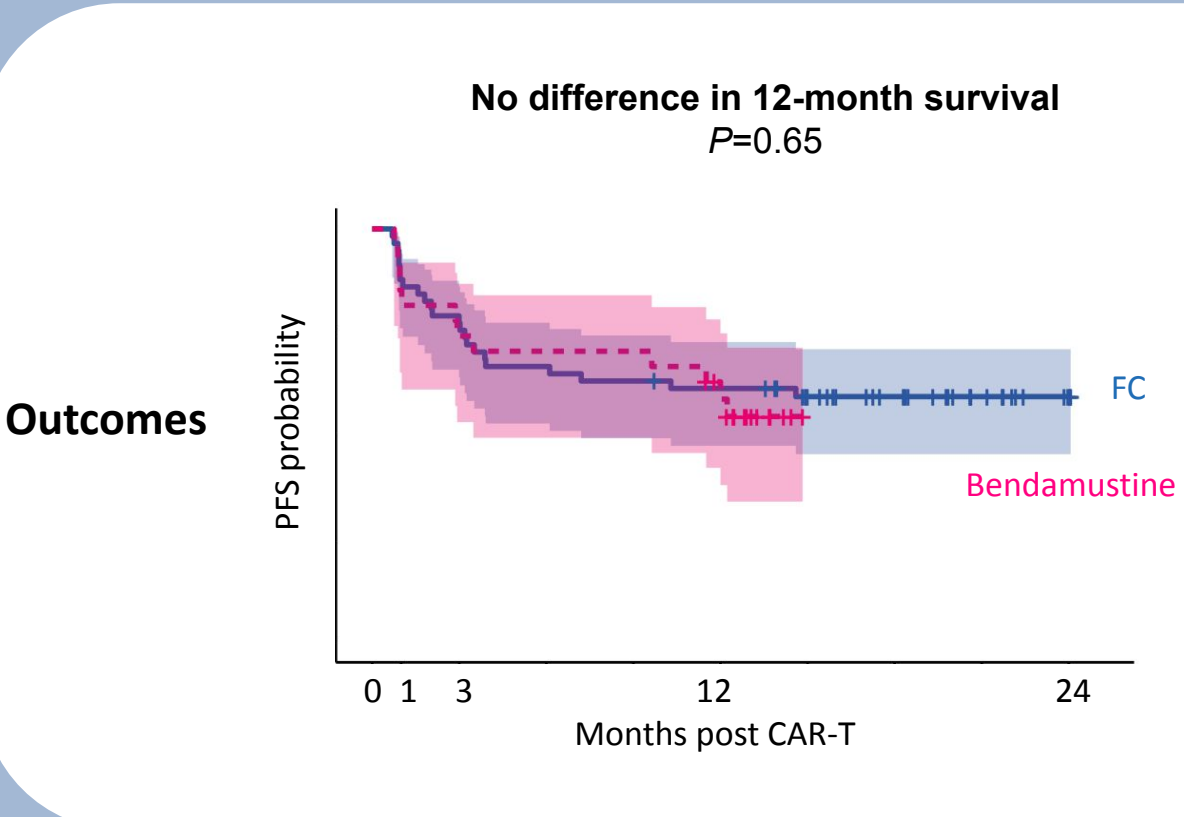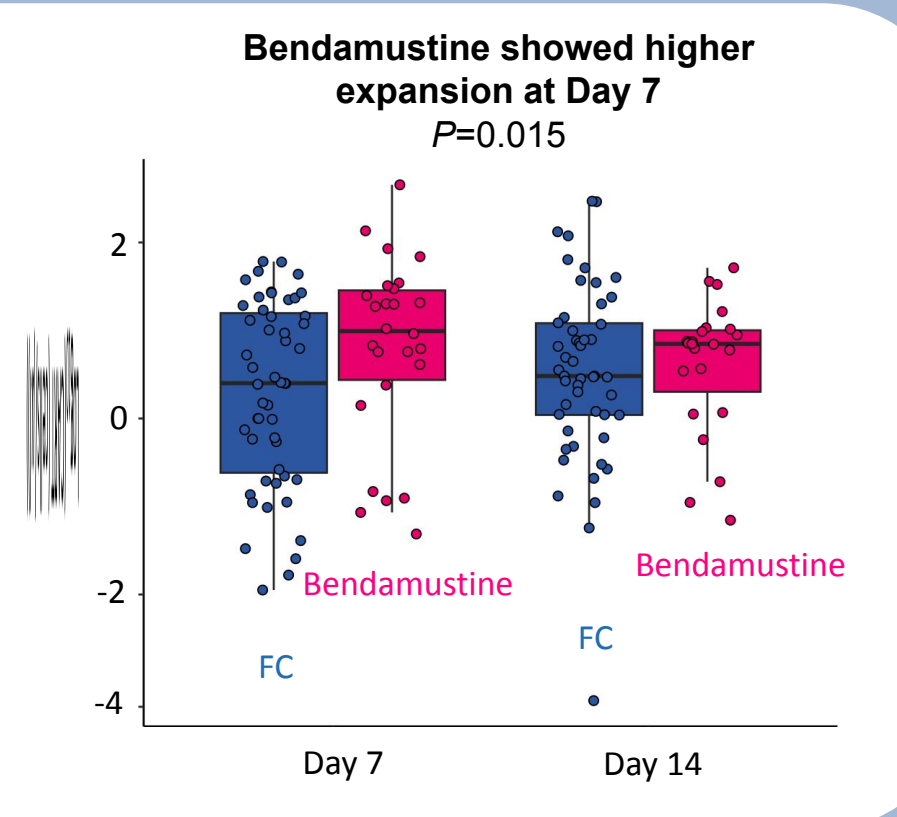

Supplement: jitc-2024-008975supp002.pdf [file jitc-2024-008975supp002.pdf]
